# Supplementary material for: Evaluation and Discrimination of Lipid Components and Iron and Zinc Levels in Chicken and Quail Eggs Available on the Polish Market
Source: MDPI journal article supplement (doi:10.3390/foods13101571), 2024-05-17
Supplement: s1 [file s1]

**Table S1** Correlation coefficients between lipid component content and iron in chicken and quail egg yolk

|              | <b>General</b> | <b>E</b> | <b>F</b> | <b>B</b> | <b>C</b> | <b>N3</b> | <b>GL</b> | <b>Q</b> |
|--------------|----------------|----------|----------|----------|----------|-----------|-----------|----------|
| C14:0        | -0.57          | 0.01     | -0.01    | 0.35     | 0.27     | 0.30      | -0.31     | 0.19     |
| C14:1        | -0.50          | -0.18    | -0.20    | 0.36     | 0.17     | 0.33      | -0.28     | 0.50     |
| C15:0        | -0.65          | -0.20    | 0.21     | 0.01     | 0.23     | 0.19      | 0.04      | 0.22     |
| C16:0        | -0.56          | -0.09    | -0.18    | 0.28     | 0.20     | 0.22      | -0.19     | 0.06     |
| C16:1        | -0.54          | -0.21    | -0.27    | 0.31     | 0.25     | 0.29      | -0.35     | 0.35     |
| C17:0        | -0.51          | 0.03     | 0.32     | 0.07     | -0.04    | 0.04      | 0.11      | -0.01    |
| C17:1        | -0.63          | -0.04    | -0.06    | 0.04     | 0.11     | -0.07     | 0.12      | 0.14     |
| C18:0        | -0.45          | -0.06    | 0.07     | 0.32     | 0.08     | 0.18      | -0.08     | -0.14    |
| c9 C18:1 OL  | -0.58          | -0.01    | -0.33    | -0.06    | 0.08     | 0.08      | -0.28     | -0.10    |
| c11 C18:1    | -0.63          | -0.21    | -0.19    | 0.08     | 0.02     | 0.05      | -0.20     | 0.30     |
| C18:2 n6 LA  | -0.46          | 0.02     | 0.16     | 0.37     | -0.05    | 0.15      | -0.09     | 0.33     |
| C18:3 n6 GLA | -0.33          | -0.05    | 0.42     | 0.06     | 0.33     | 0.23      | 0.16      | 0.36     |
| C18:3 n3 ALA | -0.12          | 0.03     | -0.01    | 0.44     | 0.14     | -0.36     | -0.05     | -0.15    |
| C20:0        | -0.56          | -0.28    | -0.05    | 0.37     | 0.26     | 0.31      | -0.25     | 0.06     |
| C20:1        | -0.59          | -0.18    | -0.12    | 0.30     | 0.13     | 0.16      | -0.30     | -0.08    |
| C21:0        | -0.42          | 0.02     | 0.20     | 0.55     | 0.08     | 0.23      | -0.19     | 0.24     |
| C20:2        | -0.09          | -0.50    | 0.11     | -0.05    | 0.08     | 0.15      | -0.19     | 0.23     |
| C20:3 n6     | -0.71          | -0.32    | 0.31     | 0.18     | 0.29     | 0.30      | -0.27     | 0.27     |
| C20:4 n6 AA  | -0.58          | -0.15    | 0.40     | -0.04    | 0.11     | 0.24      | 0.27      | -0.05    |
| C22:0        | -0.34          | 0.01     | -0.45    | 0.29     | 0.50     | 0.05      | -0.20     | 0.11     |
| C20:5 EPA    | 0.12           | -0.65    | 0.02     | -0.08    | -0.02    | -0.37     | 0.08      | -0.22    |
| C22:2        | -0.58          | -0.14    | -0.15    | -0.39    | 0.02     | -0.08     | -0.26     | -0.18    |
| C24:0        | 0.15           | -0.16    | -0.03    | -0.11    | 0.22     | 0.60      | 0.00      | 0.47     |
| C22:5        | 0.07           | -0.04    | -0.09    | 0.16     | 0.50     | -0.36     | 0.21      | -0.27    |
| C22:6 n3 DHA | -0.33          | -0.10    | -0.12    | 0.30     | 0.35     | -0.47     | 0.43      | -0.32    |
| Cholesterol  | -0.05          | 0.09     | 0.39     | -0.42    | -0.05    | 0.00      | -0.04     | -0.16    |

The red colour of the font indicates  $p < 0.05$

E - chicken eggs from organic production, F - free range chicken eggs, B - barn chicken eggs, C - chicken eggs from caged hens, N3 - chicken eggs with an increased content of n3 fatty acids, GL - chicken eggs from Green-legged Partridge, Q - partridge quail eggs

**Table S2.** Correlation coefficients between lipid component content and zinc in in chicken and quail egg yolk

|              | General | E     | F     | B     | C     | N3    | GL    | Q     |
|--------------|---------|-------|-------|-------|-------|-------|-------|-------|
| C14:0        | -0.14   | 0.15  | -0.22 | -0.08 | 0.02  | 0.34  | -0.14 | -0.05 |
| C14:1        | -0.03   | 0.16  | -0.31 | -0.12 | -0.03 | 0.61  | 0.01  | -0.45 |
| C15:0        | -0.12   | -0.04 | -0.05 | 0.22  | -0.01 | 0.13  | -0.09 | -0.76 |
| C16:0        | -0.28   | -0.06 | -0.38 | -0.29 | -0.04 | 0.21  | -0.05 | -0.23 |
| C16:1        | -0.11   | 0.14  | -0.33 | -0.13 | 0.00  | 0.46  | -0.11 | -0.30 |
| C17:0        | -0.31   | -0.24 | -0.05 | -0.25 | 0.06  | -0.12 | -0.27 | 0.05  |
| C17:1        | -0.12   | -0.01 | -0.18 | -0.19 | -0.06 | -0.27 | -0.25 | -0.28 |
| C18:0        | -0.40   | -0.37 | -0.19 | -0.12 | 0.01  | 0.16  | -0.08 | -0.23 |
| c9 C18:1 OL  | -0.34   | -0.07 | -0.35 | -0.23 | -0.04 | -0.17 | -0.05 | -0.07 |
| c11 C18:1    | -0.06   | 0.07  | -0.21 | -0.10 | -0.06 | 0.09  | -0.14 | 0.10  |
| C18:2 n6 LA  | -0.11   | -0.10 | 0.02  | -0.10 | 0.07  | 0.04  | -0.07 | 0.04  |
| C18:3 n6 GLA | -0.40   | -0.24 | 0.03  | -0.17 | 0.13  | 0.16  | -0.25 | -0.18 |
| C18:3 n3 ALA | -0.10   | -0.26 | -0.08 | 0.12  | -0.17 | -0.63 | -0.14 | 0.45  |
| C20:0        | -0.09   | -0.09 | -0.20 | -0.17 | -0.09 | 0.32  | -0.15 | -0.26 |
| C20:1        | -0.01   | -0.13 | -0.07 | 0.14  | -0.06 | -0.08 | -0.01 | -0.34 |
| C21:0        | 0.25    | 0.00  | 0.05  | 0.05  | 0.14  | 0.19  | -0.05 | -0.55 |
| C20:2        | 0.23    | 0.21  | 0.07  | 0.06  | 0.04  | 0.49  | -0.07 | -0.39 |
| C20:3 n6     | -0.07   | -0.07 | 0.05  | -0.20 | 0.11  | 0.06  | 0.02  | -0.52 |
| C20:4 n6 AA  | -0.21   | -0.19 | -0.06 | -0.21 | 0.09  | 0.21  | -0.13 | -0.20 |
| C22:0        | -0.27   | -0.22 | -0.47 | -0.11 | 0.20  | -0.15 | 0.37  | -0.07 |
| C20:5 EPA    | -0.22   | 0.23  | -0.19 | -0.24 | -0.59 | -0.48 | 0.07  | 0.33  |
| C22:2        | -0.07   | 0.01  | -0.06 | 0.00  | 0.10  | -0.31 | 0.04  | -0.17 |
| C24:0        | -0.36   | -0.30 | 0.02  | -0.23 | 0.31  | 0.60  | -0.18 | -0.34 |
| C22:5        | -0.66   | -0.55 | -0.22 | -0.10 | -0.05 | -0.65 | -0.30 | 0.28  |
| C22:6 n3 DHA | -0.41   | -0.40 | -0.25 | -0.04 | -0.14 | -0.79 | -0.07 | 0.73  |
| Cholesterol  | -0.37   | 0.02  | 0.18  | -0.26 | -0.34 | -0.03 | 0.29  | -0.46 |

The red colour of the font indicates  $p < 0.05$

E - chicken eggs from organic production, F - free range chicken eggs, B - barn chicken eggs, C - chicken eggs from caged hens, N3 - chicken eggs with an increased content of n3 fatty acids, GL - chicken eggs from Green-legged Partridge, Q - partridge quail eggs
